# Supplementary material for: Senescent fibroblasts drive ageing pigmentation: ​A potential therapeutic target for senile lentigo
Source: PubMed Central journal article supplement — Theranostics. 2018 Sep 9;8(17):4620–32. doi: 10.7150/thno.26975 (PMC6160768; doi:10.7150/thno.26975), 2018-09-09
Supplement: thnov08p4620s1.pdf [file thnov08p4620s1.pdf]

### Supplement Figure S1

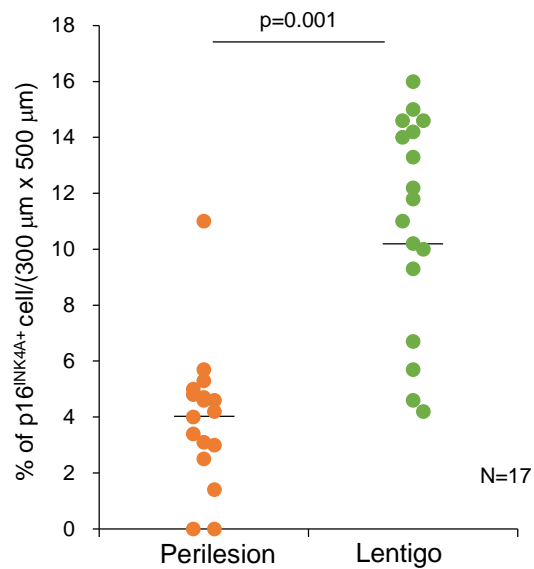

### Supplement Figure S2

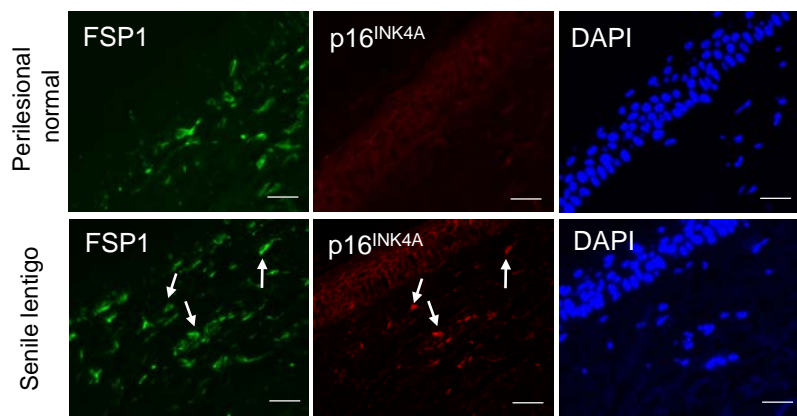

### Supplement Figure S3

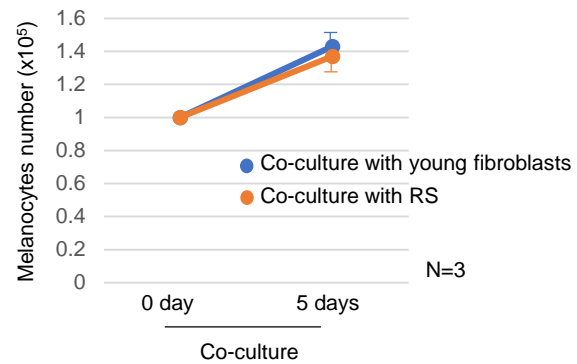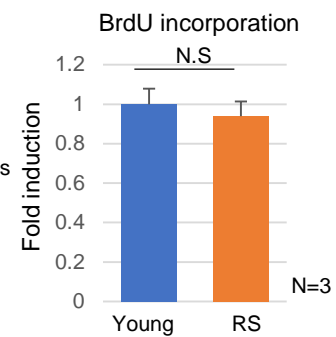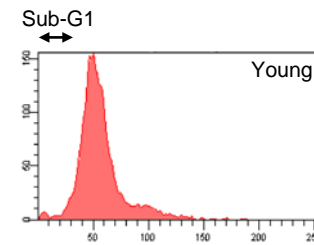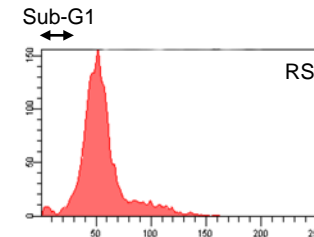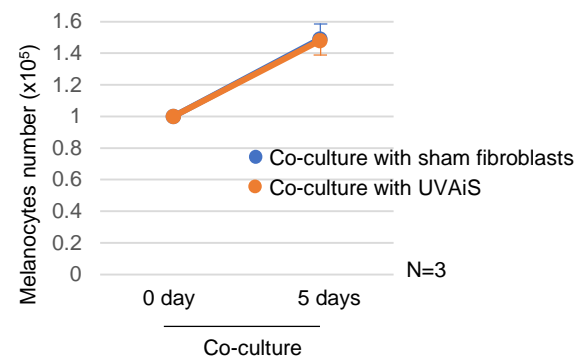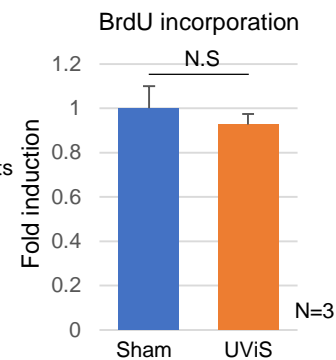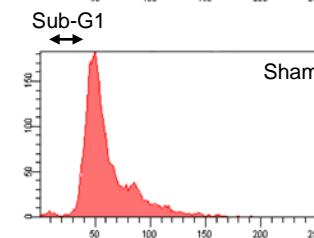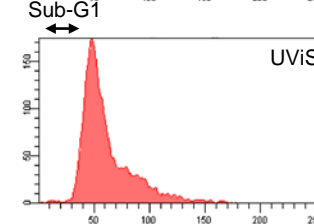

## Supplement Figure S4

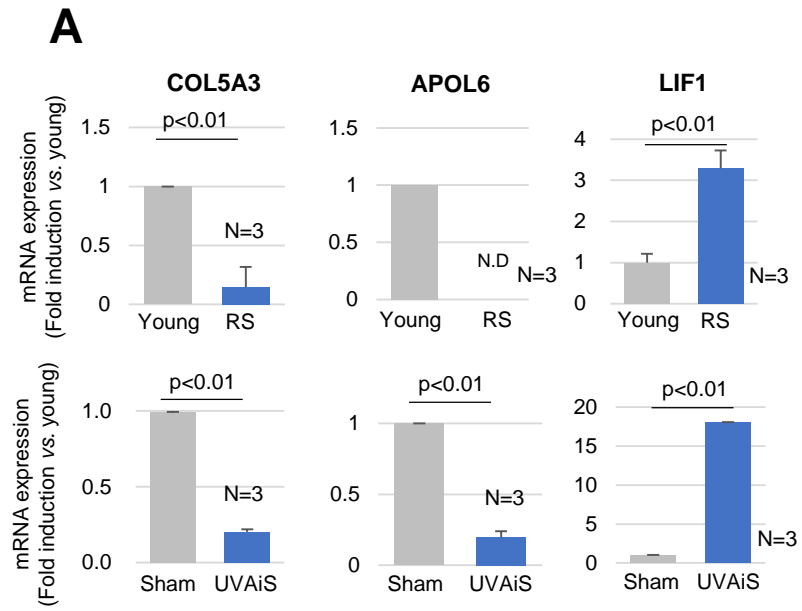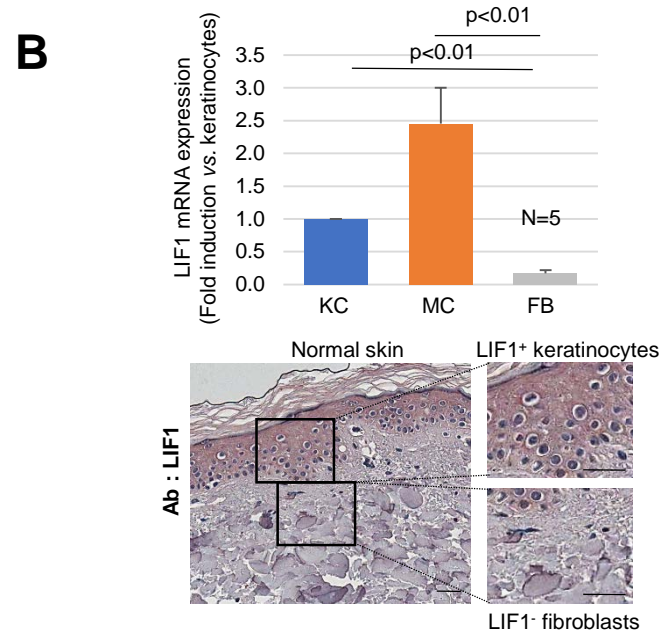

**Supplement Figure S5**

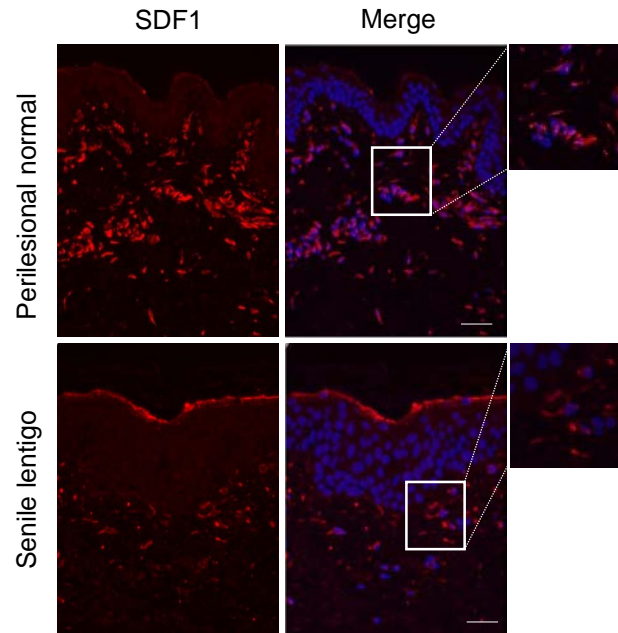

**Supplement Figure S6**

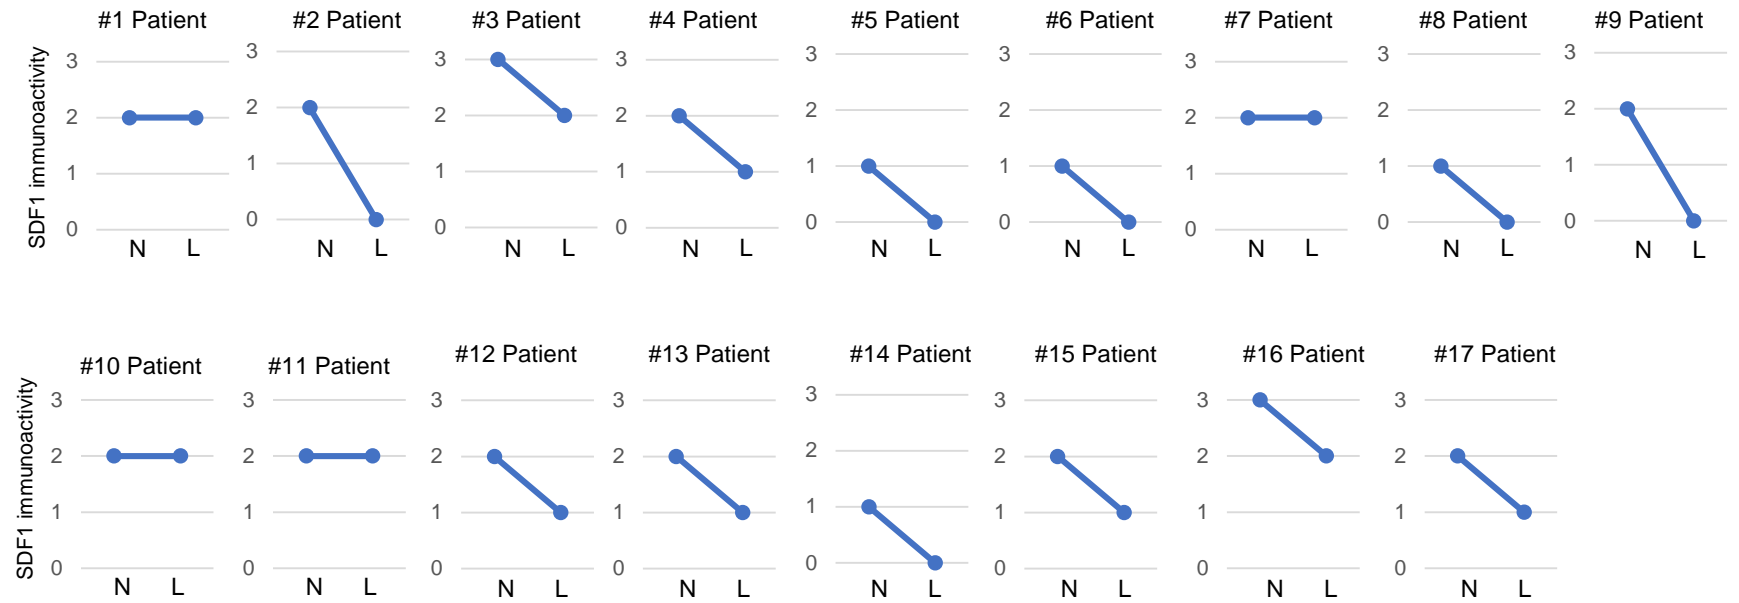

## Supplement Figure S7

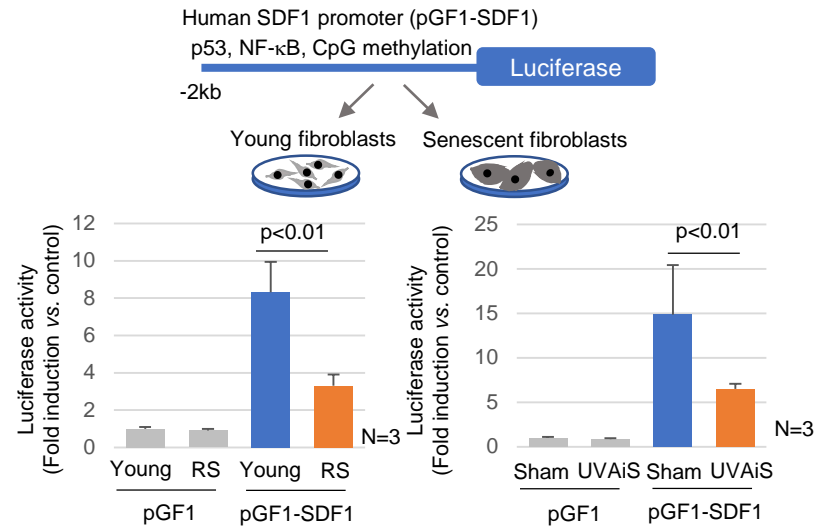

## Supplement Figure S8

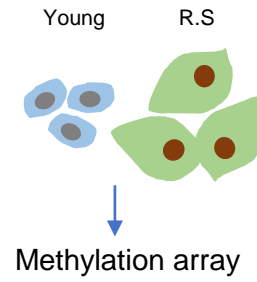

SDF1 CpG island methylation

| Target ID         | R.S AVG Beta | Young AVG Beta | UCSC REFGENE GROUP |
|-------------------|--------------|----------------|--------------------|
| <i>cg07001963</i> | 0.4433818    | 0.1477356      | Body               |
| <i>cg2671843</i>  | 0.2630038    | 0.04585296     | TSS200             |
| <i>cg11267527</i> | 0.894617     | 0.6182697      | TSS1500            |
| <i>cg18618334</i> | 0.7266957    | 0.3488797      | TSS1500            |
| <i>cg19959917</i> | 0.8025302    | 0.5268313      | Body               |

## Supplement Figure S9

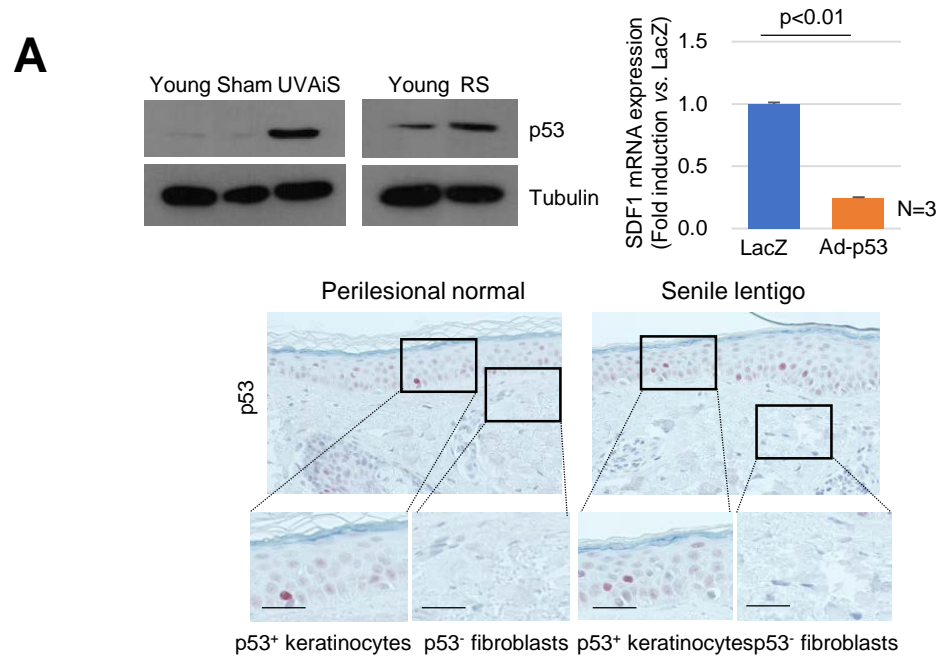

**B**

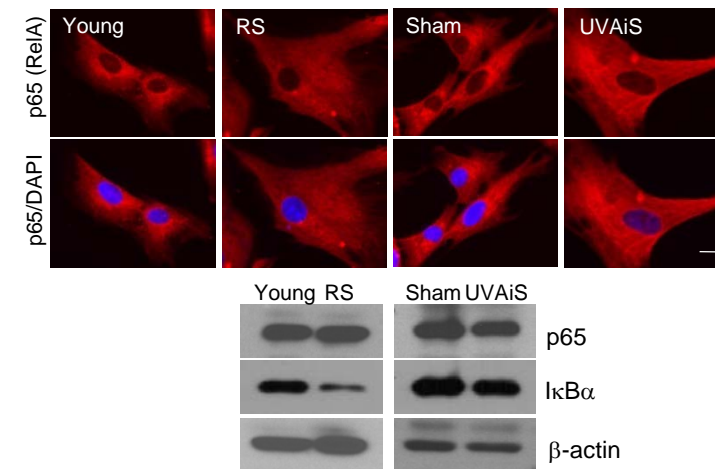

Supplement Figure S10

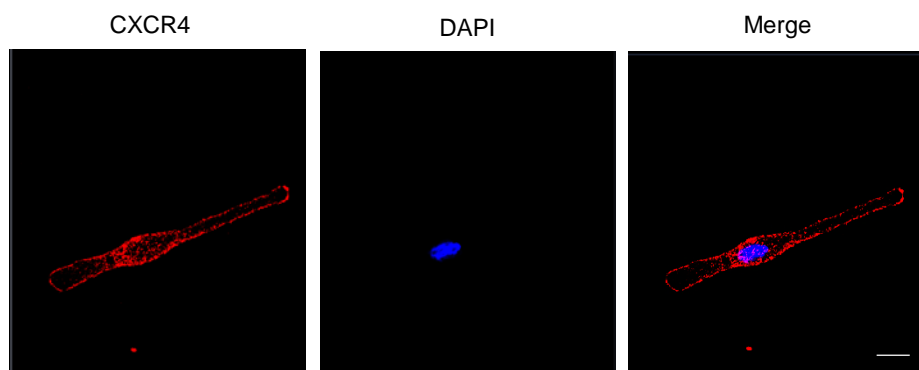

Supplement Figure S11

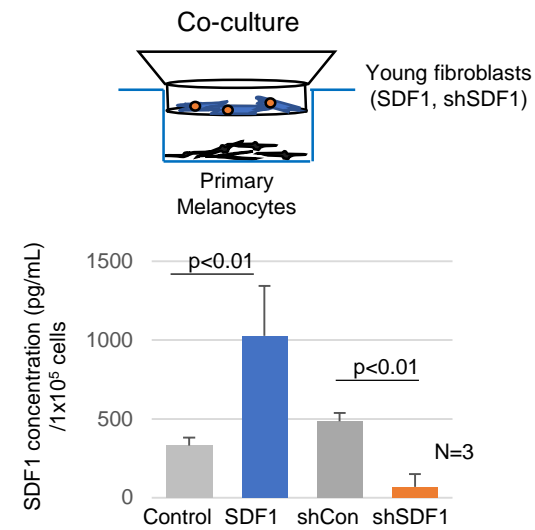

## Supplement Figure S12

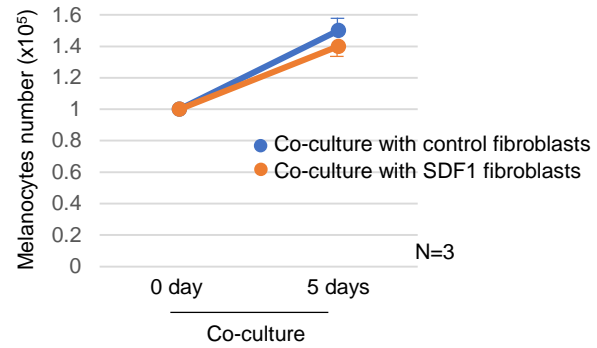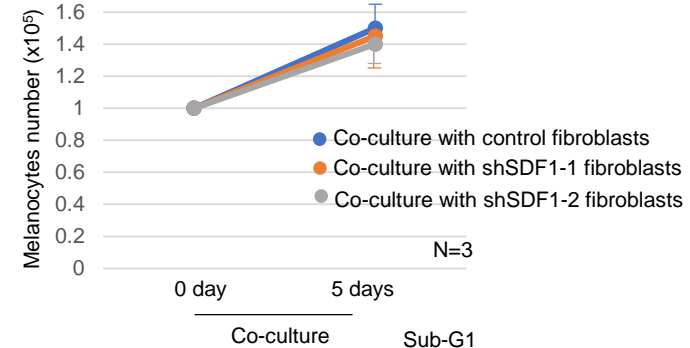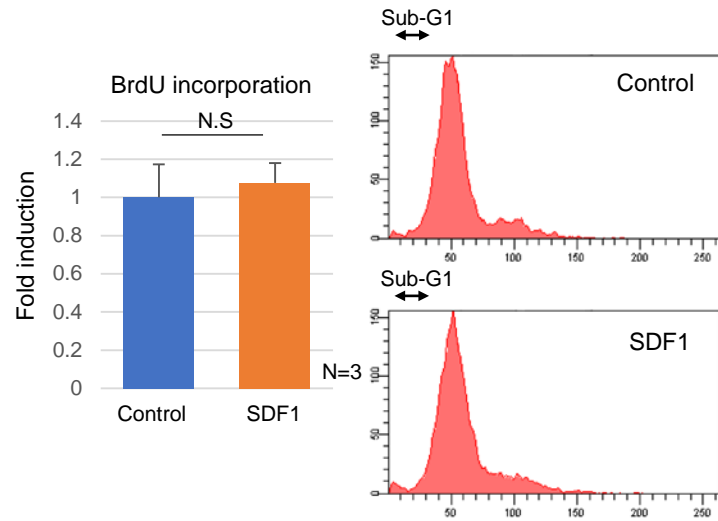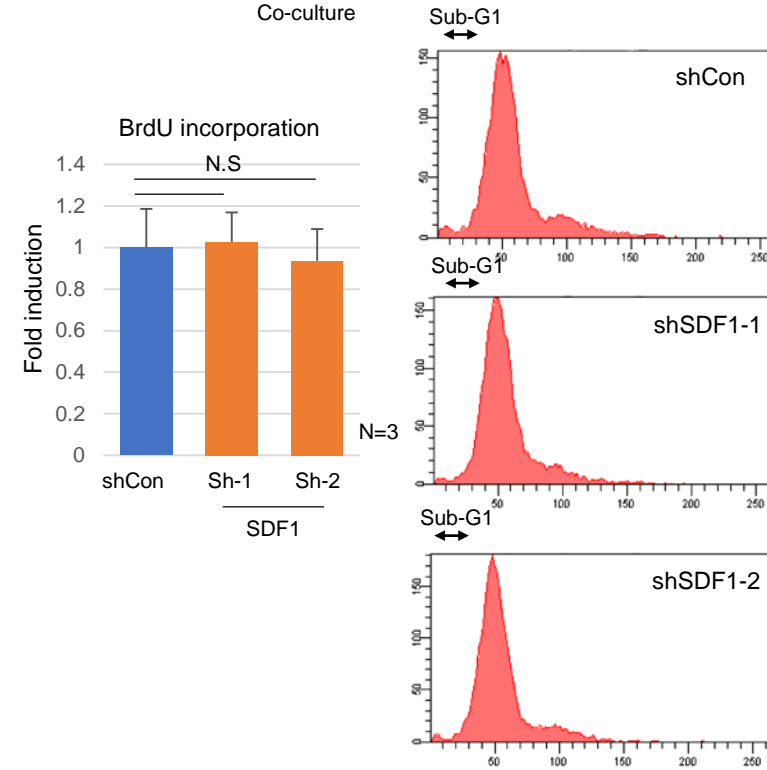

## Supplement Figure S13

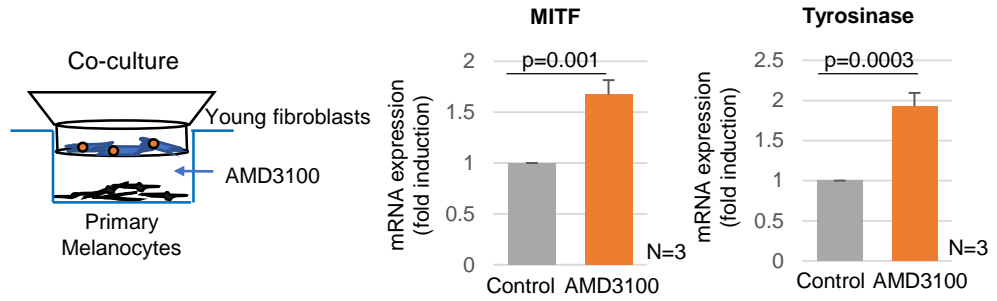

## Supplement Figure S14

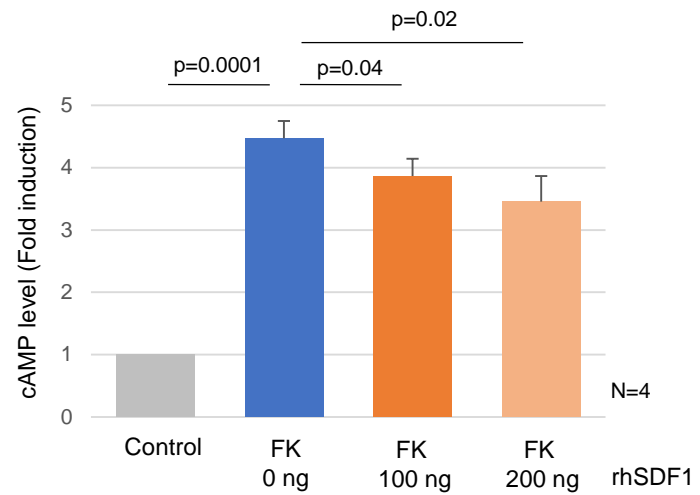

## Supplement Figure S15

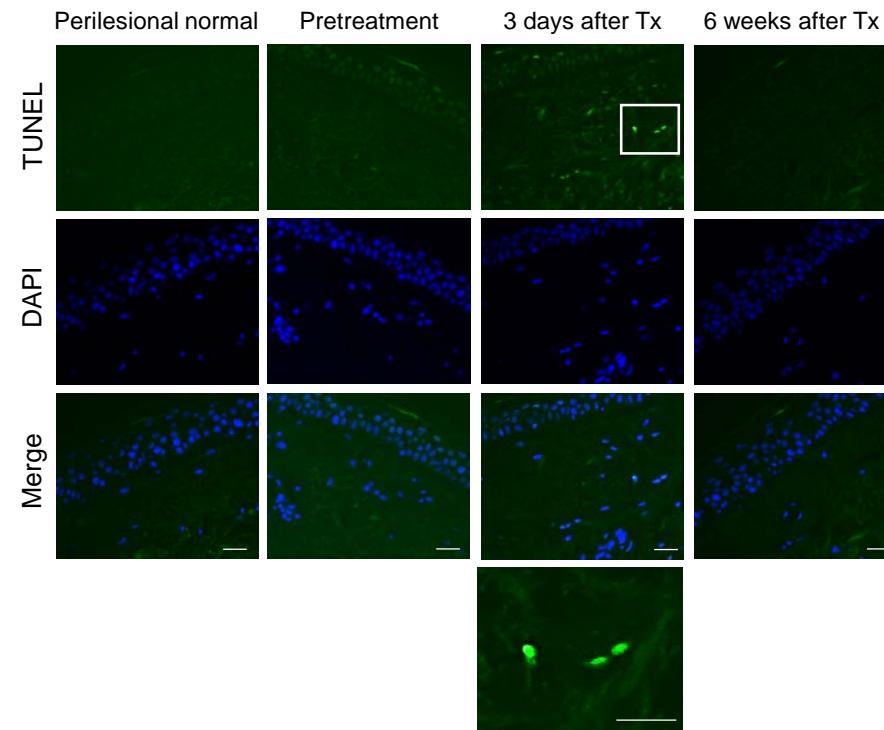

## Supplement Figure S16

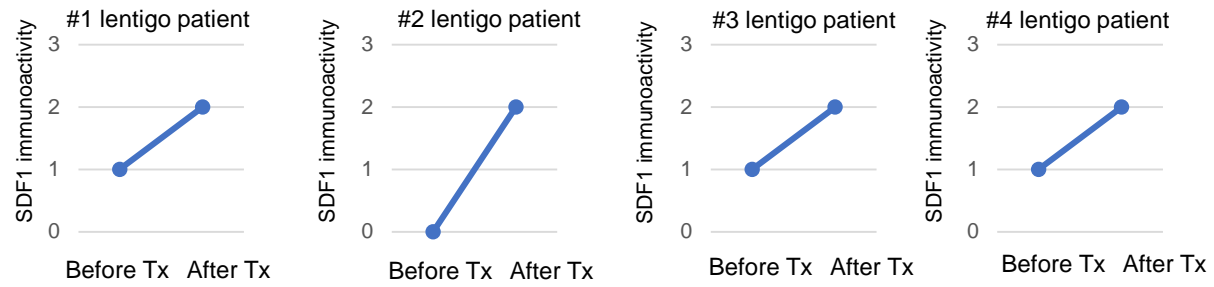

## Supplement Figure S17

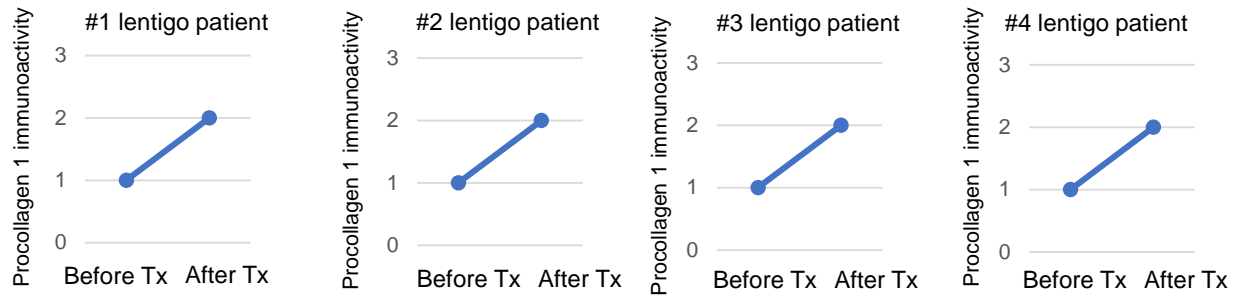



### Supplement figure legends

**Figure S1.** Senescent cells in senile lentigo (SL). Fourteen cases of SL were stained with p16<sup>INK4A</sup> and positive spindle-shaped cells were counted and presented as a dotted graph (% of p16<sup>INK4A</sup>-positive spindle-shaped cells/total spindle-shaped cells. *p* value, Wilcoxon test). Numbers indicate the means of percentages in each case.

**Figure S2.** Senescent fibroblasts in senile lentigo and perilesional normal. Immunostaining of fibroblast-specific protein 1 (FSP1, green) and p16<sup>INK4A</sup> (red). The scale bar indicates 50  $\mu$ m

**Figure S3.** Effect of senescent fibroblasts in melanocyte proliferation. Melanocytes ( $1 \times 10^5$ ) were co-cultured with senescent fibroblasts or controls for five days. The numbers of melanocytes were analyzed (left panel). BrdU incorporation assay. Melanocytes were co-cultured with senescent or young fibroblasts for three days and BrdU incorporation was analyzed by ELISA (middle panel). FACS analysis. Melanocytes were co-cultured with senescent or young fibroblasts for three days. The sub-G1 population was analyzed by FACS (right panel). (*p* value, *t*-test)

**Figure S4.** (A) Real-time PCR analysis of target genes. N.D.: not detected. (B) LIF1 expression levels in skin cells. The upper panel shows the results of a real-time PCR analysis of LIF1 mRNA expression levels in cultured melanocytes (MC), keratinocytes (KC) and fibroblasts (FB). LIF1 immunostaining of normal human skin (lower panel, scale bar, 50  $\mu$ m). (*p* value, *t*-test)

**Figure S5.** Immunohistochemical analysis of SDF1 expression level in perilesional and lentigo lesion skin. The scale bar indicates 50  $\mu$ m.

**Figure S6.** Immunohistochemical analysis of SDF1 expression in perilesional and lentigo lesion skin. Seventeen cases of lentigo were stained with an anti-SDF1 antibody. The intensity levels were analyzed and are presented here as none (0), weak (1+), moderate (2+), and strong (3+). N and L indicate

perilesional normal skin and senile lentigo, respectively.

**Figure S7.** SDF1 transcriptional regulation. Two kilobases of human SDF1 promoter were cloned and inserted into a pGF1 vectors (pGF1-SDF1), generated a lentivirus. A control (empty pGF1) or SDF1-pGF1 lentivirus was infected into young, replicative senescent, sham or UVA-induced senescent fibroblasts, after which the luciferase activity was measured in each case with a luminometer. (*p* value, *t*-test)

**Figure S8.** DNA methylation profiles of replicative senescent fibroblasts. A methylation array was performed in young and replicative senescent fibroblasts. SDF1 CpG islands methylation is presented.

**Figure S9.** (A) SDF1 expression regulation by p53. The p53 expression levels were analyzed by western blotting in young, replicative and UVA-induced senescent fibroblasts (upper panel). Young fibroblasts were infected with Ad-LacZ (control) or a p53-expressing adenovirus (Ad-p53) for two days. The SDF1 mRNA expression levels were analyzed by real-time PCR. The lower panel shows the p53 immunostaining of SL skin samples (scale bar, 50  $\mu$ m). (B) NF- $\kappa$ B signaling in senescent fibroblasts. Immunocytochemical staining of p65 (RelA) localization (upper panel, scale bar, 10  $\mu$ m) and results of a western blotting analysis of I $\kappa$ B $\alpha$  degradation (lower panel). (*p* value, *t*-test)

**Figure S10.** Immunocytochemical analysis of CXCR4 in cultured melanocytes (Scale bar, 10  $\mu$ m).

**Figure S11.** Fibroblasts were infected with a sh-Control (shCon), SDF1 or with the shSDF1 lentivirus and co-cultured with human primary melanocytes. SDF1 protein was measured by ELISA (lower panel). (*p* value, *t*-test)

**Figure S12.** Cell proliferation assay. Melanocytes ( $1 \times 10^5$ ) were co-cultured with fibroblasts infected with the SDF1 or shSDF1 lentivirus for five days and the numbers of melanocytes were analyzed. BrdU

incorporation assay. Melanocytes were co-cultured with control, SDF1 overexpressed or shSDF1 infected fibroblasts for three days. The degree of BrdU incorporation was then analyzed by ELISA. FACS analysis. Melanocytes were co-cultured with control, SDF1 overexpressed or shSDF1 infected fibroblasts for three days and Sub-G1 populations were analyzed by FACS. (*p* value, *t*-test)

**Figure S13.** AMD3100 increased pigmentation-related genes expression. Human primary melanocytes were treated with CXCR4 antagonist AMD3100 (1  $\mu$ M) and co-cultured with human primary fibroblasts for three days. The MITF and tyrosinase mRNA expression levels were analyzed by real-time PCR. (*p* value, *t*-test)

**Figure S14.** SDF1 decreased forskolin-induced cAMP levels in melanocytes. Melanocytes were treated with rhSDF1 (0 to 200 ng/mL) for 10 min before a forskolin treatment (700 ng/mL) for 30 min. The cAMP levels were then analyzed. (*p* value, *t*-test)

**Figure S15.** Matched biopsies from four individual subjects, one pair (SL and perilesional normal) from untreated faces and a second pair from faces treated with RF, were assayed the apoptotic cells using TUNEL assay (scale bar, 50  $\mu$ m).

**Figure S16.** Lentigo patients were treated with six instances of radiofrequency (RF). The SDF1 expression levels were analyzed using immunohistochemistry. The intensity levels are presented here as none (0), weak (1+), moderate (2+), and strong (3+) (n=4).

**Figure S17.** Lentigo patients were treated with six instances of radiofrequency (RF). The procollagen type 1 expression levels were analyzed using immunohistochemistry. The intensity levels are presented here as none (0), weak (1+), moderate (2+), and strong (3+) (n=4).
